# Supplementary material for: Hepatic Transcriptome Profiling Reveals Lack of Acsm3 Expression in Polydactylous Rats with High-Fat Diet-Induced Hypertriglyceridemia and Visceral Fat Accumulation
Source: MDPI journal article supplement (doi:10.3390/nu13051462), 2021-04-25
Supplement: s1 [file s1]

**Table S1. High fat diet composition**

| <b>Crude nutrients</b> | <b>%</b>    |
|------------------------|-------------|
| Dry matter             | 95.1        |
| Crude protein (Nx6,25) | 20.8        |
| <b>Crude fat</b>       | <b>30.2</b> |
| Crude fibre            | 5.0         |
| Crude ash              | 5.6         |
| N free extracts        | 33.4        |
| Starch/Dextrins        | 22.1        |
| Sugar                  | 13.0        |

| <b>Fatty acids</b>         | <b>%</b>   |
|----------------------------|------------|
| C 4:0                      | 0.12       |
| C 6:0                      | 0.11       |
| C 8:0                      | 0.50       |
| C 10:0                     | 0.45       |
| C 12:0                     | 2.81       |
| C 14:0                     | 1.77       |
| C 16:0                     | 8.57       |
| C 16:1                     | 0,4        |
| C 17:0                     | 0.13       |
| C 18:0                     | 2.63       |
| C 18:1                     | 8.83       |
| C 18:2                     | 1.60       |
| C 18:3                     | 0.12       |
| C 20:0                     | 0.07       |
| C 20:1                     | 0.01       |
| C 20:4                     | 0.02       |
| <b>Cholesterol (mg/kg)</b> | <b>171</b> |
